# Supplementary material
Source: publisher figshare collection journal article supplement (https://acs.figshare.com/ndownloader/files/3940159)
Supplement: Supplementary file 1 [file 3940159]

Supporting Information for:

**Radical Reductive Elimination from Tetrabenzyluranium Mediated by an Iminoquinone Ligand**

**Ellen M. Matson,<sup>[a]</sup> Sebastian Franke,<sup>[b]</sup> Nickolas H. Anderson,<sup>[a]</sup> Timothy D. Cook,<sup>[a]</sup> Phillip E. Fanwick,<sup>[a]</sup> and Suzanne C. Bart<sup>[a]\*</sup>**

[a] Department of Chemistry, Purdue University, West Lafayette, IN 47906

[b] Department of Chemistry and Pharmacy, Friedrich-Alexander University of Erlangen-Nuremberg, Egerlandstrasse 1, 91058 Erlangen, Germany.

**Table of Contents:**

|                                                |    |
|------------------------------------------------|----|
| Figure S1.....                                 | 2  |
| Figure S2.....                                 | 3  |
| Figure S3.....                                 | 3  |
| Figure S4.....                                 | 4  |
| Figure S5.....                                 | 4  |
| Figure S6.....                                 | 5  |
| Figure S7.....                                 | 6  |
| Crystallographic Experimental Information..... | 8  |
| Experimental for Magnetic Measurements.....    | 12 |
| References.....                                | 13 |

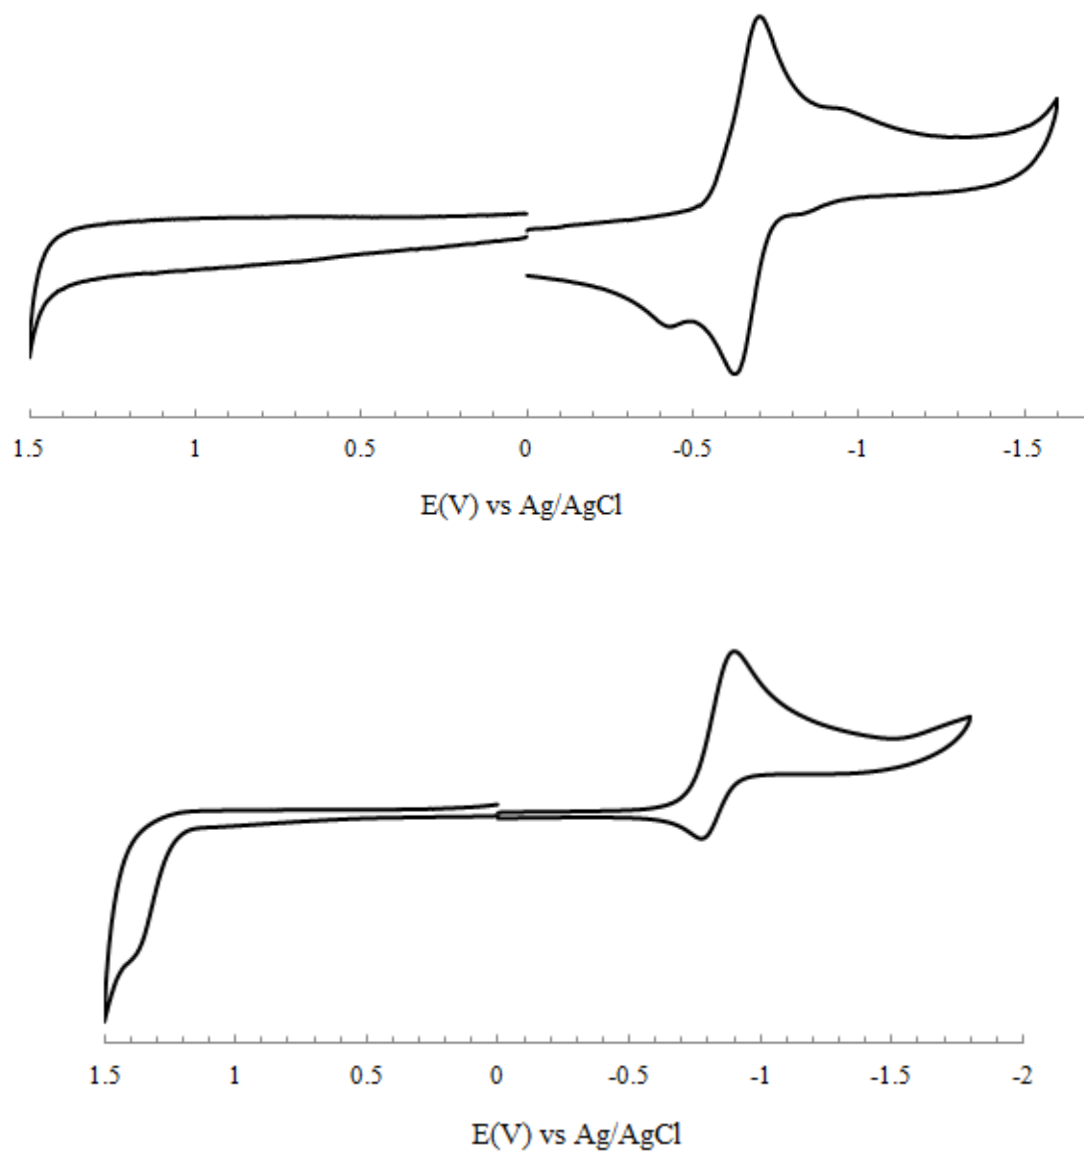

**Figure S1. Top:** Cyclic voltammogram of  $\text{dipp}^{\text{iq}}$  recorded in 0.20 M THF solution of  $(n\text{-Bu})_4\text{NPF}_6$  at a scan rate of 0.1 V/s.  $E_{1/2}$ : -0.664 V.  $i_b/i_f$ : 0.815. **Bottom:** Cyclic voltammogram of  $\text{MesDAB}^{\text{Mes}}$  recorded in 0.20 M THF solution of  $(n\text{-Bu})_4\text{NPF}_6$  at a scan rate of 0.1 V/s.  $E_{1/2}$ : -0.839.  $i_b/i_f$ : 0.462.

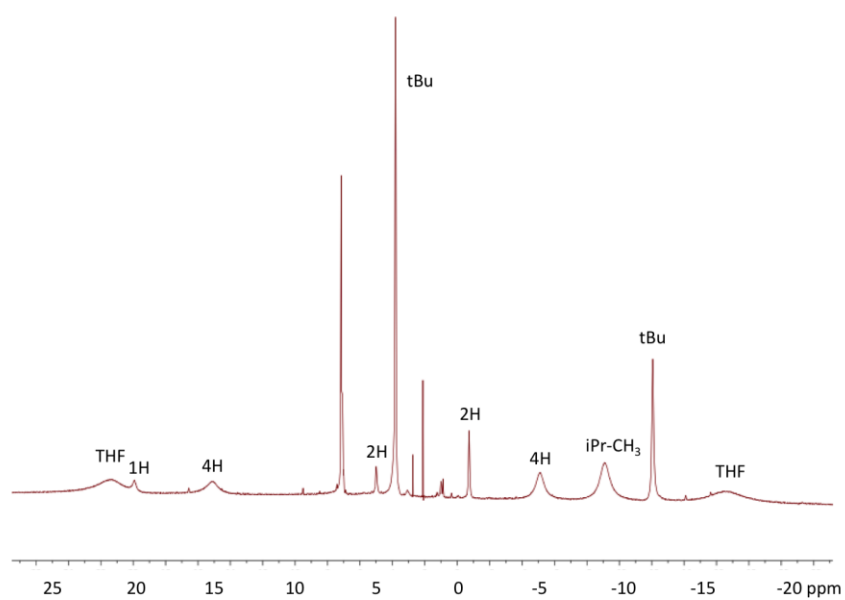

**Figure S2.** <sup>1</sup>H NMR spectrum (C<sub>6</sub>D<sub>6</sub>, 25 °C) of **2**

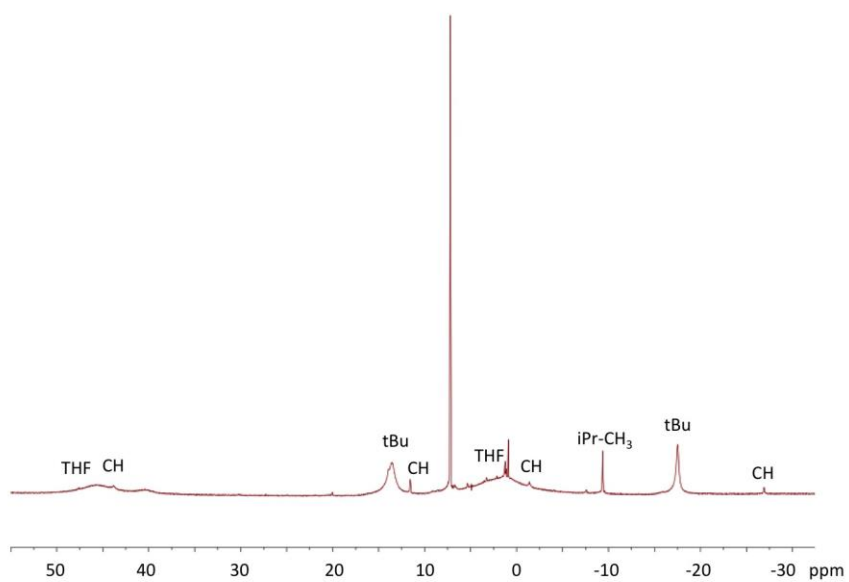

**Figure S3.** <sup>1</sup>H NMR spectrum (C<sub>6</sub>D<sub>6</sub>, 25 °C) of **3**

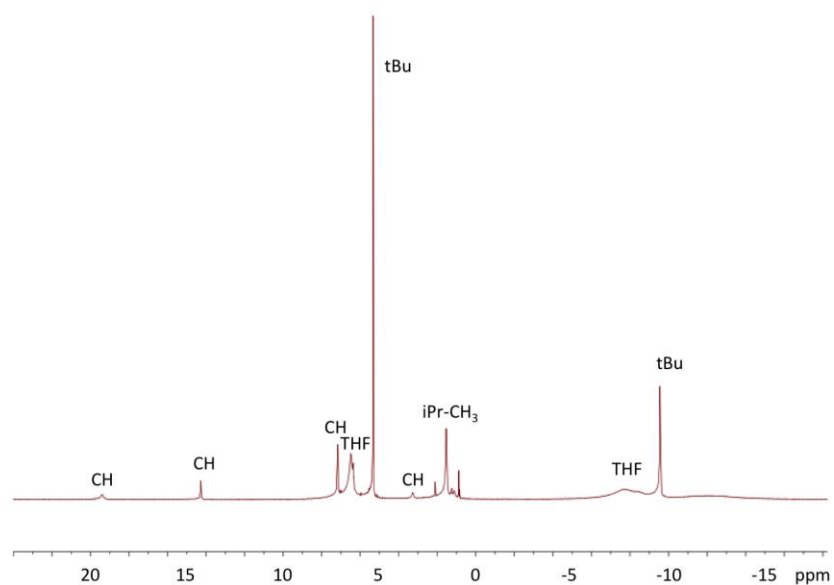

**Figure S4.**  $^1\text{H}$  NMR spectrum ( $\text{C}_6\text{D}_6$ , 25  $^\circ\text{C}$ ) of **4**

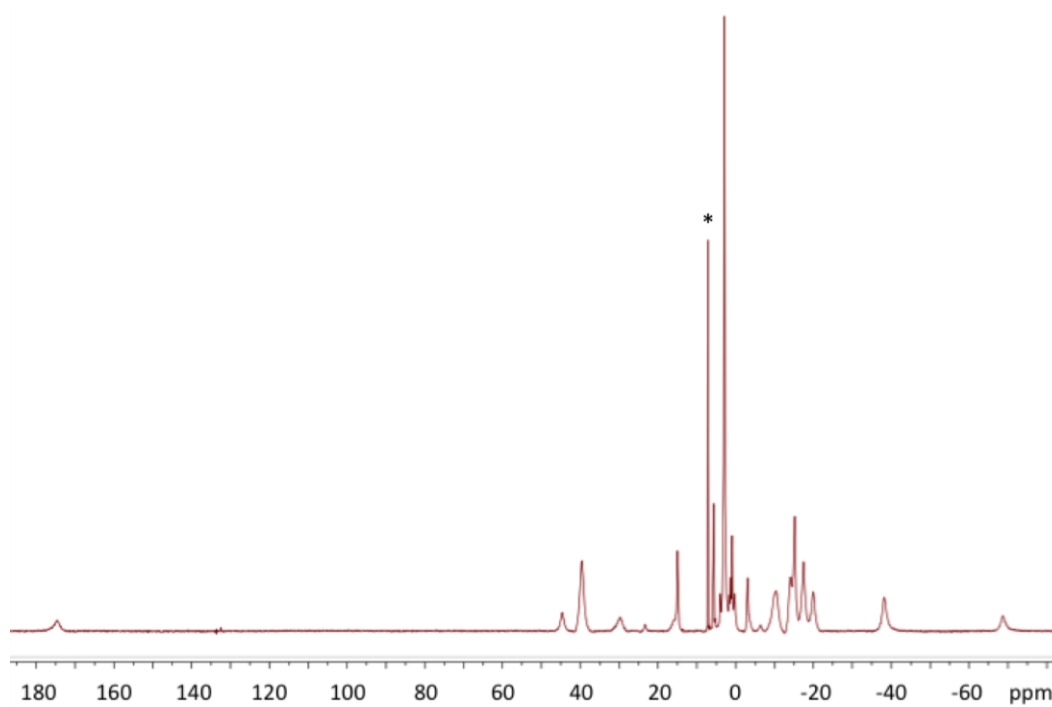

**Figure S5.**  $^1\text{H}$  NMR spectrum ( $\text{C}_6\text{D}_6$ , 25  $^\circ\text{C}$ ) of **5**. Residual solvent denoted as (\*).

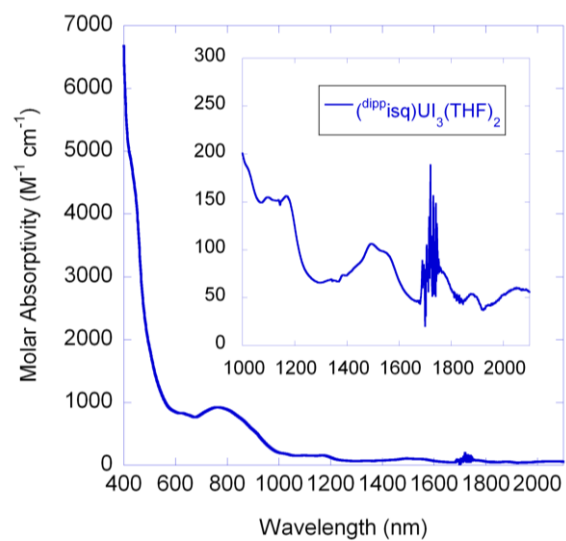

**Figure S6.** Electronic absorption spectrum of  $(\text{dippisq})\text{U}(\text{I})_3(\text{THF})_2$  (**3**) (blue) in THF at ambient temperature. Inset shows the near-infrared region of the spectrum. Solvent overtones are present in between 1600 and 1800 nm.

**Figure S7.** GC/MS data for crossover experiment. M/Z: 182 ( $\text{C}_6\text{H}_5\text{CH}_2\text{CH}_2\text{C}_6\text{H}_5$ ), 189 ( $\text{C}_6\text{D}_5\text{CD}_2\text{CH}_2\text{C}_6\text{H}_5$ ), 196 ( $\text{C}_6\text{D}_5\text{CD}_2\text{CD}_2\text{C}_6\text{D}_5$ ).

File :C:\msdchem\1\DATA\MB1.D  
 Operator :  
 Acquired : 3 Jul 2012 11:56 using AcqMethod ei for ci source.M  
 Instrument : GCMS  
 Sample Name: emm-crossover  
 Misc Info : ei 100(.1)320(100db5)  
 Y 1 Number: 1

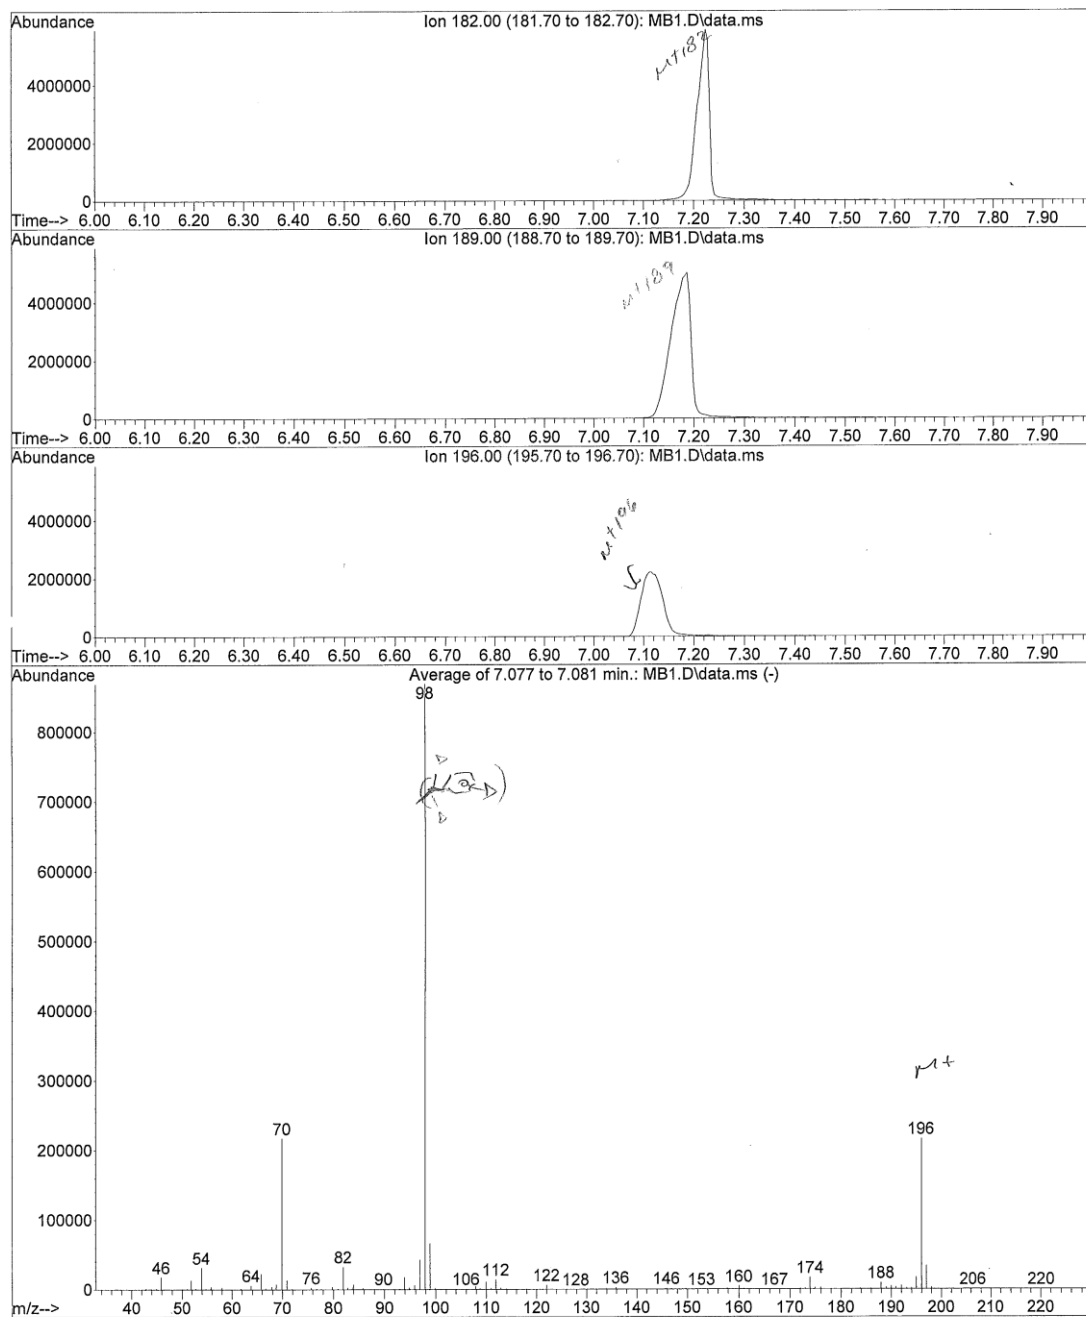

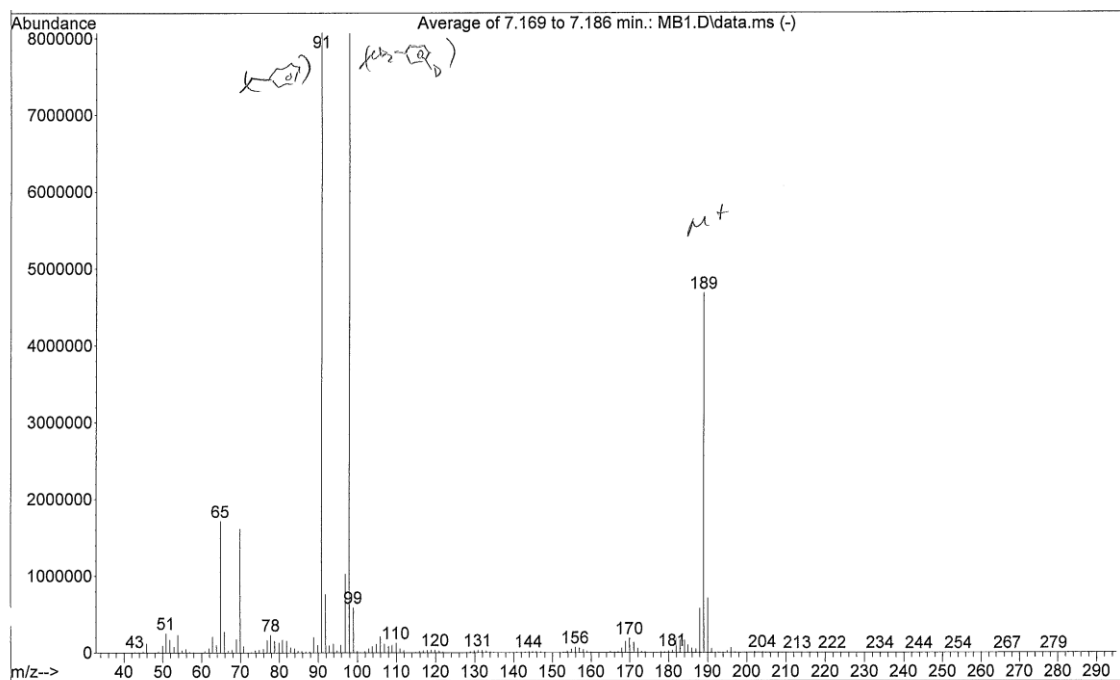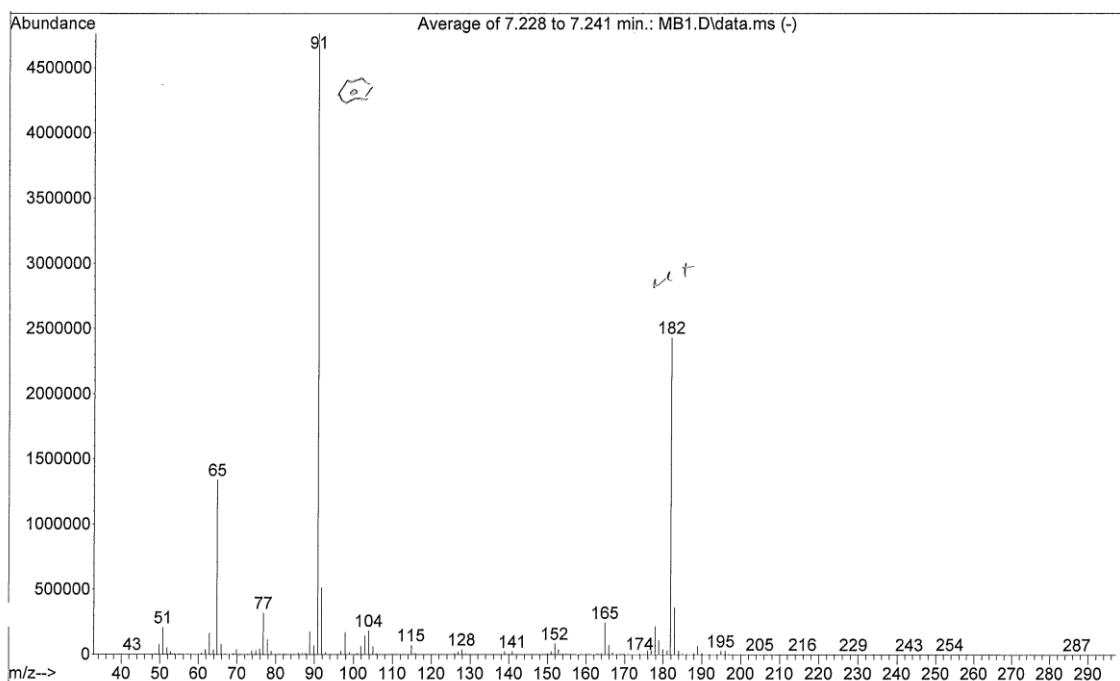

## EXPERIMENTAL: (<sup>dipp</sup>ap)U(CH<sub>2</sub>Ph)<sub>2</sub>(THF)<sub>2</sub> (2)

### DATA COLLECTION

A red plate of C<sub>48</sub>H<sub>66</sub>NO<sub>3</sub>U having approximate dimensions of 0.14 x 0.12 x 0.04 mm was mounted on a fiber in a random orientation. Preliminary examination and data collection were performed Cu K<sub>α</sub> radiation ( $\lambda = 1.54184\text{\AA}$ ) on a Rigaku Rapid II equipped with confocal optics.

Cell constants for data collection were obtained from least-squares refinement, using the setting angles of 34099 reflections in the range  $3 < \theta < 66^\circ$ . The triclinic cell parameters and calculated volume are:  $a = 11.1218(7)$ ,  $b = 11.7622(7)$ ,  $c = 17.4818(13)\text{\AA}$ ,  $\alpha = 77.253(6)$ ,  $\beta = 77.037(5)$ ,  $\gamma = 87.418(4)^\circ$ ,  $V = 2173.7(2)\text{\AA}^3$ . For  $Z = 2$  and F.W. = 944.10 the calculated density is 1.44 g/cm<sup>3</sup>. The refined mosaicity from DENZO/SCALEPACK<sup>[1]</sup> was 0.95° indicating moderate crystal quality. The space group was determined by the program XPREP.<sup>[2]</sup> There were no systematic absences; the space group was determined to be P -1(# 2).

The data were collected at a temperature of 150(1)K. Data were collected to a maximum  $2\theta$  of 133.3°.

### DATA REDUCTION

A total of 34099 reflections were collected, of which 5441 were unique. Frames were integrated with DENZO-SMN.<sup>[1]</sup>

Lorentz and polarization corrections were applied to the data. The linear absorption coefficient is 108.1 /mm for Cu K<sub>α</sub> radiation. An empirical absorption correction using SCALEPACK<sup>[1]</sup> was applied. Transmission coefficients ranged from 0.478 to 0.649. Intensities of equivalent reflections were averaged. The agreement factor for the averaging was 8.0% based on intensity.

### STRUCTURE SOLUTION AND REFINEMENT

The structure was solved using the structure solution program PATTY in DIRDIF99.<sup>[3]</sup> The remaining atoms were located in succeeding difference Fourier syntheses. Hydrogen atoms were included in the refinement but restrained to ride on the atom to which they are bonded. The structure was refined in full-matrix least-squares where the function minimized was  $\sum w(|F_o|^2 - |F_c|^2)^2$  and the weight  $w$  is defined as  $1/[s^2(F_o^2) + (0.0948P)^2 + 5.0051P]$  where  $P = (F_o^2 + 2F_c^2)/3$ . Scattering factors were taken from the "International Tables for Crystallography".<sup>[4]</sup> 5441 reflections were used in the refinements. However, only the 5115 reflections with  $F_o^2 > 2s(F_o^2)$  were used in, calculating R1. The final cycle of refinement included 498 variable parameters and converged (largest parameter shift was <0.01 times its su) with unweighted and weighted agreement factors of:

$$R1 = \sum |F_o - F_c| / \sum F_o = 0.051$$



$$R2 = \text{SQRT} ( \sum w ( F_o^2 - F_c^2 )^2 / \sum w (F_o^2)^2 ) = 0.133$$

The goodness-of-fit parameter was 1.08. The highest peak in the final difference Fourier had a height of 2.32 e/Å<sup>3</sup>. The minimum negative peak had a height of -0.69 e/Å<sup>3</sup>.

Refinement was performed on a LINUX PC using SHELX-97.<sup>[2]</sup> Crystallographic drawings were done using programs ORTEP<sup>[5]</sup> and PLUTON<sup>[6]</sup>.

## EXPERIMENTAL: (dipp<sup>isq</sup>)UI<sub>3</sub>(THF)<sub>2</sub> (3)

### DATA COLLECTION

A brown plate of C<sub>34</sub>H<sub>53</sub>I<sub>3</sub>NO<sub>3</sub>U.C<sub>4</sub>H<sub>8</sub>O having approximate dimensions of 0.20 x 0.15 x 0.08 mm was mounted on a fiber in a random orientation. Preliminary examination and data collection were performed Cu K<sub>α</sub> radiation (λ = 1.54184 Å) on a Rigaku Rapid II equipped with confocal optics.

Cell constants for data collection were obtained from least-squares refinement, using the setting angles of 33999 reflections in the range 2 < q < 68°. The monoclinic cell parameters and calculated volume are: a = 11.1652(3), b = 11.1044(3) c = 35.4297(10) Å, b = 92.594(2)°, V = 4388.2(2) Å<sup>3</sup>. For Z = 4 and F.W. = 1214.66 the calculated density is 1.84 g/cm<sup>3</sup>. The refined mosaicity from DENZO/SCALEPACK<sup>[1]</sup> was 0.42° indicating good crystal quality. The space group was determined by the program XPREP.<sup>[2]</sup> From the systematic presences of:

$$\begin{array}{ll} h0l & l=2n \\ 0k0 & k=2n \end{array}$$

and from subsequent least-squares refinement, the space group was determined to be P 1 21/c 1 (# 14).

The data were collected at a temperature of 150(1)K. Data were collected to a maximum 2θ of 136.8°.

### DATA REDUCTION

A total of 33999 reflections were collected, of which 7882 were unique. Frames were integrated with DENZO-SMN.<sup>[1]</sup>

Lorentz and polarization corrections were applied to the data. The linear absorption coefficient is 272.5 /mm for Cu K<sub>α</sub> radiation. An empirical absorption correction using SCALEPACK<sup>[1]</sup> was applied. Transmission coefficients ranged from 0.073 to 0.113. Intensities of equivalent reflections were averaged. The agreement factor for the averaging was 6.6% based on intensity.

## STRUCTURE SOLUTION AND REFINEMENT

The structure was solved using the structure solution program PATTY in DIRDIF99.<sup>[3]</sup> The remaining atoms were located in succeeding difference Fourier syntheses. Hydrogen atoms were included in the refinement but restrained to ride on the atom to which they are bonded. The structure was refined in full-matrix least-squares where the function minimized was  $S w(|F_o|^2 - |F_c|^2)^2$  and the weight  $w$  is defined as  $1/[s^2(F_o^2) + (0.0908P)^2 + 18.0363P]$  where  $P = (F_o^2 + 2F_c^2)/3$ . Scattering factors were taken from the "International Tables for Crystallography".<sup>[4]</sup> 7882 reflections were used in the refinements. However, only the 7628 reflections with  $F_o^2 > 2s(F_o^2)$  were used in, calculating R1. The final cycle of refinement included 434 variable parameters and converged (largest parameter shift was <0.01 times its su) with unweighted and weighted agreement factors of:

$$R1 = S |F_o - F_c| / S F_o = 0.046$$

$$R2 = \text{SQRT} ( S w ( F_o^2 - F_c^2 )^2 / S w ( F_o^2 )^2 ) = 0.130$$

The goodness-of-fit parameter was 1.10. The highest peak in the final difference Fourier had a height of 2.85 e/A<sup>3</sup>. The minimum negative peak had a height of -3.56 e/A<sup>3</sup>.

Refinement was performed on a LINUX PC using SHELX-97.<sup>[2]</sup> Crystallographic drawings were done using programs ORTEP<sup>[5]</sup> and PLUTON<sup>[6]</sup>.

EXPERIMENTAL: (<sup>dipp</sup>ap)UI(CH<sub>2</sub>Ph)(THF)<sub>2</sub> (**5**)

## DATA COLLECTION

A red plate of C<sub>41</sub>H<sub>60</sub>INO<sub>3</sub>U,0.5(C<sub>7</sub>H<sub>8</sub>) having approximate dimensions of 0.20 x 0.14 x 0.03 mm was mounted on a fiber in a random orientation. Preliminary examination and data collection were performed Cu K<sub>α</sub> radiation ( $\lambda = 1.54184 \text{ \AA}$ ) on a Rigaku Rapid II equipped with confocal optics.

Cell constants for data collection were obtained from least-squares refinement, using the setting angles of 121346 reflections in the range  $2 < \theta < 68^\circ$ . The monoclinic cell parameters and calculated volume are:  $a = 28.2048(9)$ ,  $b = 15.3209(5)$ ,  $c = 22.6313(7) \text{ \AA}$ ,  $\beta = 108.301(2)^\circ$ ,  $V = 9284.8(5) \text{ \AA}^3$ . For  $Z = 8$  and F.W. = 1025.95 the calculated density is 1.47 g/cm<sup>3</sup>. The refined mosaicity from DENZO/SCALEPACK<sup>[1]</sup> was  $0.41^\circ$  indicating good crystal quality. The space group was determined by the program XPREP.<sup>[2]</sup> From the systematic presences of:

$$h0l \quad l=2n$$

$$0k0 \quad k=2n$$

and from subsequent least-squares refinement, the space group was determined to be P 1 21/c 1 (# 14).

The data were collected at a temperature of 150(1)K. Data were collected to a maximum  $2\theta$  of  $136.7^\circ$ .

## DATA REDUCTION

A total of 121346 reflections were collected, of which 13745 were unique. Frames were integrated with DENZO-SMN.<sup>[1]</sup>

Lorentz and polarization corrections were applied to the data. The linear absorption coefficient is 153.2 /mm for Cu K<sub>a</sub> radiation. An empirical absorption correction using SCALEPACK<sup>[1]</sup> was applied. Transmission coefficients ranged from 0.161 to 0.631. Intensities of equivalent reflections were averaged. The agreement factor for the averaging was 10.9% based on intensity.

## STRUCTURE SOLUTION AND REFINEMENT

The remaining atoms were located in succeeding difference Fourier syntheses. Hydrogen atoms were included in the refinement but restrained to ride on the atom to which they are bonded. The structure was refined in full-matrix least-squares where the function minimized was  $\sum w(|F_o|^2 - |F_c|^2)^2$  and the weight  $w$  is defined as  $1/[s^2(F_o^2) + (0.1441P)^2 + 25.1546P]$  where  $P = (F_o^2 + 2F_c^2)/3$ . Scattering factors were taken from the "International Tables for Crystallography".<sup>[4]</sup> 13745 reflections were used in the refinements. However, only the 11340 reflections with  $F_o^2 > 2s(F_o^2)$  were used in, calculating R1. The final cycle of refinement included 932 variable parameters and converged (largest parameter shift was <0.01 times its su) with unweighted and weighted agreement factors of:

$$R1 = \sum |F_o - F_c| / \sum F_o = 0.070$$
$$R2 = \text{SQRT} \left( \sum w (F_o^2 - F_c^2)^2 / \sum w (F_o^2)^2 \right) = 0.201$$

The goodness-of-fit parameter was 1.08. The highest peak in the final difference Fourier had a height of 1.86 e/A<sup>3</sup>. The minimum negative peak had a height of -2.08 e/A<sup>3</sup>. Residual electron density was adjusted using the SQUEEZE option in PLATON (ref 5).

Refinement was performed on a LINUX PC using SHELX-97.<sup>[2]</sup> Crystallographic drawings were done using programs ORTEP<sup>[5]</sup> and PLUTON<sup>[6]</sup>.

#### Experimental for Magnetic Measurements:

Magnetism data of crystalline powdered samples (20 – 30 mg) were recorded with a SQUID magnetometer (Quantum Design) at 10 kOe (2 – 300 K for **2** and **3**). Values of the magnetic susceptibility were corrected for the underlying diamagnetic increment ( $\chi_{\text{dia}} = -550.04 \times 10^{-6} \text{ cm}^3 \text{ mol}^{-1}$  (**2**),  $-542.15 \times 10^{-6} \text{ cm}^3 \text{ mol}^{-1}$  (**3**)) by using tabulated Pascal constants and the effect of the blank sample holders (gelatin capsule/ straw).<sup>[7]</sup> Samples used for magnetization measurements were recrystallized multiple times and checked for chemical composition and purity by elemental analysis (C, H, N) and <sup>1</sup>H NMR spectroscopy. Data reproducibility was also carefully checked on independently synthesized samples. "

References:

- [1] Z. M. Otwinowski, W., *Methods Enzymol.* **1997**, 276, 307.
- [2] G. M. Sheldrick, *Acta Crystallographica Section A* **2008**, 112, 64.
- [3] P. T. B. Beurskens, G.; de Gelder, R.; Garcia-Granda, S.; Gould, R. O.; Smits, J. M. M., *DIRDIF2008 Program System*, University of Nijmegen: The Netherlands, **2008**.
- [4] *International Tables for Crystallography, Vol. C*, Kluwer Academic Publishers, Utrecht, The Netherlands, **1992**.
- [5] C. K. Johnson, *ORTEP II, Report ORNL-5138*, Oak Ridge National Laboratory, Tennessee, USA, **1976**.
- [6] A. L. Spek, *J. Apply. Cryst.* **2003**, 36, 7.
- [7] G. A. Bain and J. F. Berry, *J. Chem. Educ.* **2008**, 85, 532-536.
